# Supplementary material
Source: MDPI journal article supplement (https://www.mdpi.com/2225-1154/9/4/60)
Supplement: s1 [file s1]

## **Projections of local knowledge-based adaptation strategies of Mexican coffee farmers**

### **Supplementary material**

#### **Supplementary Material 1. Calculation and variables used by CO2Fix model**

The stem growth and biomass were expressed as a function of the current annual increase (CAI). The CAI of each cohort was calculated based on the actual above-ground biomass over the current achievable maximum of the cohort (Table SM1 and SM2). The aerial biomass and the CAI of the shadow trees (banana tree, coffee, living barriers and living fences) were determined using the database generated from an inventory previously carried out by Ruiz et al. (2020) in 25 coffee plots. Wood density for shadow trees, living barriers and living fences was obtained from Díaz et al. (2015); for banana and coffee cohorts from Negash and Kanninen (2015). The percentage of carbon content was taken from Kuyah et al. (2012) while, for banana and coffee cohort it was taken from Negash, Starr, and Kanninen (2013) and Negash, Starr, Kanninen, et al. (2013) respectively. The growth of foliage, branches and roots with respect to stem growth was calculated with allometric equations for dominant tree species (Segura, Kanninen and Suárez, 2006); for coffee plants we follow Negash et al., (2013) and for banana tree Nyombi et al. (2009). The coefficient of rotation of foliage, branches and roots for all cohorts was obtained from Negash and Kanninen (2015). Natural and harvested mortality for all cohorts were from field observations (Table SM1 and SM2).

**Table SM1.** Input data to run CO2Fix model in the biomass module. Example of a plot with base scenario 1 (Shade trees-coffee-living barriers).

| Cohort        | Maximum<br>aboveground<br>biomass (Mg ha <sup>-1</sup> ) | C content<br>(%) | Wood<br>density<br>(MgDM/m3) | Bio/<br>Biomax | Stem                                             | Foliage                                |                    | Branch                                 |                    | Roots                   |                    | Mortality<br>(20% ST*;<br>10% coffee) |                         |
|---------------|----------------------------------------------------------|------------------|------------------------------|----------------|--------------------------------------------------|----------------------------------------|--------------------|----------------------------------------|--------------------|-------------------------|--------------------|---------------------------------------|-------------------------|
|               |                                                          |                  |                              |                | Growth (ICA<br>m <sup>3</sup> ha <sup>-1</sup> ) | Initial<br>C (Mg<br>ha <sup>-1</sup> ) | Relative<br>growth | Initial<br>C (Mg<br>ha <sup>-1</sup> ) | Relative<br>growth | Initial<br>C<br>(Mg/ha) | Relative<br>growth |                                       | Initial<br>C<br>(Mg/ha) |
| Shade trees   | 36.5                                                     | 0.48             | 0.6                          | 0.000          | 0.000                                            |                                        |                    | 0.000                                  |                    | 0.000                   |                    | 0.050                                 |                         |
|               |                                                          |                  |                              | 0.016          | 9.108                                            |                                        | 0.079              |                                        | 0.175              |                         | 0.101              |                                       | 0.020                   |
|               |                                                          |                  |                              | 0.042          | 13.790                                           |                                        | 0.180              |                                        | 0.597              |                         | 0.265              |                                       | 0.020                   |
|               |                                                          |                  |                              | 0.131          | 28.242                                           | 8.716                                  | 0.446              | 1.741                                  | 1.664              | 6.025                   | 0.814              | 2.979                                 | 0.020                   |
|               |                                                          |                  |                              | 0.156          | 16.428                                           |                                        | 0.519              |                                        | 1.976              |                         | 0.970              |                                       | 0.020                   |
|               |                                                          |                  |                              | 0.272          | 13.266                                           |                                        | 0.838              |                                        | 3.409              |                         | 1.690              |                                       | 0.020                   |
|               |                                                          |                  |                              | 0.500          | 3.000                                            |                                        | 0.800              |                                        | 3.000              |                         | 1.000              |                                       | 0.050                   |
| Coffee        | 13.99                                                    | 0.49             | 0.62                         | 0.002          | 0.670                                            |                                        | 0.001              |                                        | 0.011              |                         | 0.005              |                                       | 0.030                   |
|               |                                                          |                  |                              | 0.009          | 3.856                                            |                                        | 0.006              |                                        | 0.066              |                         | 0.029              |                                       | 0.010                   |
|               |                                                          |                  |                              | 0.025          | 0.528                                            | 3.791                                  | 0.016              | 0.319                                  | 0.136              | 2.649                   | 0.058              | 1.141                                 | 0.010                   |
|               |                                                          |                  |                              | 0.057          | 0.100                                            |                                        | 0.038              |                                        | 0.317              |                         | 0.137              |                                       | 0.040                   |
|               |                                                          |                  |                              | 0.000          | 0.000                                            |                                        | 0.000              |                                        | 0.000              |                         | 0.000              |                                       | 0.050                   |
|               |                                                          |                  |                              | 0.001          | 0.910                                            |                                        | 0.007              |                                        | 0.017              |                         | 0.010              |                                       | 0.020                   |
|               |                                                          |                  |                              | 0.004          | 1.379                                            |                                        | 0.018              |                                        | 0.059              |                         | 0.026              |                                       | 0.020                   |
| Live barriers | 3.65                                                     | 0.48             | 0.6                          | 0.013          | 2.824                                            | 1.752                                  | 0.044              | 0.174                                  | 0.166              | 0.602                   | 0.081              | 0.297                                 | 0.020                   |
|               |                                                          |                  |                              | 0.015          | 1.642                                            |                                        | 0.051              |                                        | 0.197              |                         | 0.097              |                                       | 0.020                   |
|               |                                                          |                  |                              | 0.027          | 1.326                                            |                                        | 0.083              |                                        | 0.340              |                         | 0.169              |                                       | 0.020                   |
|               |                                                          |                  |                              | 0.050          | 0.300                                            |                                        | 0.080              |                                        | 0.300              |                         | 0.100              |                                       | 0.050                   |

ST\* = Shade tres. For all cohorts: Foliage rotation rate: stem and foliage, 0.5; branches, 0.05 and roots, 0.05.

**Table SM2.** Input data to parameterize the CO2Fix model in the biomass module. Example of a plot with base scenario 3 (Shade trees-banana-coffee-living fences).

| Cohort           | Maximum<br>aboveground<br>biomass (Mg ha <sup>-1</sup> ) | C content<br>(%) | Wood<br>density<br>(MgDM/m <sup>3</sup> ) | Bio/<br>Biomax | Stem                                             |                                     | Foliage            |                                     | Branch             |                                     | Roots              |                                     | Mortality (20%<br>ST; 10% coffee<br>and banana) |
|------------------|----------------------------------------------------------|------------------|-------------------------------------------|----------------|--------------------------------------------------|-------------------------------------|--------------------|-------------------------------------|--------------------|-------------------------------------|--------------------|-------------------------------------|-------------------------------------------------|
|                  |                                                          |                  |                                           |                | Growth (CAI<br>m <sup>3</sup> ha <sup>-1</sup> ) | Initial C<br>(Mg ha <sup>-1</sup> ) | Relative<br>growth | Initial C<br>(Mg ha <sup>-1</sup> ) | Relative<br>growth | Initial C<br>(Mg ha <sup>-1</sup> ) | Relative<br>growth | Initial C<br>(Mg ha <sup>-1</sup> ) |                                                 |
| Shade trees      | 12.866                                                   | 0.480            | 0.600                                     | 0              | 0                                                |                                     | 0                  |                                     | 0                  |                                     | 0                  |                                     | 0.050                                           |
|                  |                                                          |                  |                                           | 0.010          | 0.122                                            |                                     | 0.018              |                                     | 0.059              |                                     | 0.021              |                                     | 0.020                                           |
|                  |                                                          |                  |                                           | 0.027          | 0.463                                            |                                     | 0.047              |                                     | 0.090              |                                     | 0.060              |                                     | 0.020                                           |
|                  |                                                          |                  |                                           | 0.055          | 5.672                                            | 3.267                               | 0.090              | 0.785                               | 0.184              | 1.781                               | 0.120              | 1.040                               | 0.020                                           |
|                  |                                                          |                  |                                           | 0.101          | 10.558                                           |                                     | 0.172              |                                     | 0.376              |                                     | 0.221              |                                     | 0.020                                           |
|                  |                                                          |                  |                                           | 0.441          | 2.651                                            |                                     | 0.692              |                                     | 1.703              |                                     | 0.964              |                                     | 0.020                                           |
|                  |                                                          |                  |                                           | 0.800          | 0.500                                            |                                     | 0.600              |                                     | 1.700              |                                     | 0.960              |                                     | 0.050                                           |
|                  |                                                          |                  |                                           | 0              | 0                                                |                                     | 0                  |                                     |                    |                                     | 0                  |                                     | 0.030                                           |
| Banana           | 1.628                                                    | 0.470            | 0.200                                     | 0.005          | 0.128                                            |                                     | 0.000              |                                     |                    |                                     | 0.000              |                                     | 0.010                                           |
|                  |                                                          |                  |                                           | 0.009          | 2.854                                            |                                     | 0.002              |                                     |                    |                                     | 0.001              |                                     | 0.010                                           |
|                  |                                                          |                  |                                           | 0.015          | 10.616                                           | 0.405                               | 0.006              | 0.163                               |                    |                                     | 0.002              | 0.044                               | 0.010                                           |
|                  |                                                          |                  |                                           | 0.024          | 1.715                                            |                                     | 0.011              |                                     |                    |                                     | 0.003              |                                     | 0.010                                           |
|                  |                                                          |                  |                                           | 0.050          | 0.500                                            |                                     | 0.010              |                                     |                    |                                     | 0.002              |                                     | 0.030                                           |
|                  |                                                          |                  |                                           | 0              | 0                                                |                                     | 0                  |                                     | 0                  |                                     | 0                  |                                     | 0.040                                           |
| Coffee           | 2.369                                                    | 0.490            | 0.620                                     | 0.006          | 0.910                                            |                                     | 0.001              |                                     | 0.006              |                                     | 0.002              |                                     | 0.030                                           |
|                  |                                                          |                  |                                           | 0.049          | 0.220                                            | 0.656                               | 0.006              | 0.055                               | 0.046              | 0.458                               | 0.020              | 0.197                               | 0.010                                           |
|                  |                                                          |                  |                                           | 0.050          | 0.100                                            |                                     | 0.005              |                                     | 0.040              |                                     | 0.010              |                                     | 0.200                                           |
|                  |                                                          |                  |                                           | 0              | 0                                                |                                     | 0                  |                                     | 0                  |                                     | 0                  |                                     | 0.050                                           |
| Living<br>fences | 3.858                                                    | 0.480            | 0.600                                     | 0.003          | 0.036                                            |                                     | 0.005              |                                     | 0.017              |                                     | 0.006              |                                     | 0.020                                           |
|                  |                                                          |                  |                                           | 0.008          | 0.138                                            |                                     | 0.014              |                                     | 0.027              |                                     | 0.018              |                                     | 0.020                                           |
|                  |                                                          |                  |                                           | 0.016          | 1.701                                            | 0.978                               | 0.027              | 0.235                               | 0.055              | 0.534                               | 0.036              | 0.312                               | 0.020                                           |
|                  |                                                          |                  |                                           | 0.030          | 3.167                                            |                                     | 0.051              |                                     | 0.112              |                                     | 0.006              |                                     | 0.020                                           |
|                  |                                                          |                  |                                           | 0.132          | 0.795                                            |                                     | 0.207              |                                     | 0.510              |                                     | 0.289              |                                     | 0.020                                           |
|                  |                                                          |                  |                                           | 0.240          | 0.150                                            |                                     | 0.180              |                                     | 0.510              |                                     | 0.288              |                                     | 0.050                                           |

C = Carbon; CAI = current annual increment

For all cohorts: Foliage rotation rate: stem and foliage, 0.5; branches, 0.05 and roots, 0.05.

## Supplementary Material 2. Weather events recorded in media from 1970 to 2013

| Municipality | Date        | Weather event      | Damages                                                                                                          |
|--------------|-------------|--------------------|------------------------------------------------------------------------------------------------------------------|
| Coscomatepec | 17/Nov/1970 | Snowfall           | Coffee plantations with damages. Losses in plants, grains. Low coffee quality for trade.                         |
| Coatepec     | 25/Nov/1970 | Frost              | Coffee plantations with damages. Losses in plants, grains. Low coffee quality for trade.                         |
| Coatepec     | 26/Oct/1970 | Frost              | It affected the coffee harvest, the farmers thought about changing products                                      |
| Coscomatepec | 19/Mar/1976 | Hail               | Crop losses                                                                                                      |
| Coatepec     | 3/May/1981  | Storm, heavy winds | No Data                                                                                                          |
| Coatepec     | 10/Jun/1996 | Frost              | Crops damages                                                                                                    |
| Coatepec     | 11/Apr/1999 | Forest fire        | No Data                                                                                                          |
| Coscomatepec | 02/May/2006 | Hail               | Effects on agriculture and livestock                                                                             |
| Coscomatepec | 12/Dec/2006 | Frost              | Municipality declared in emergency. Impact on agriculture and livestock.                                         |
| Coscomatepec | 09/Jun/2008 | Landslides         | Damage to highways and roads                                                                                     |
| Coscomatepec | 12/Sep/2009 | Heavy rains        | Damage to highways and roads                                                                                     |
| Coscomatepec | 06/Jan/2010 | Cold front         | No Data                                                                                                          |
| Coscomatepec | 19/Sep/2010 | Heavy rains        | Victims, damages in all public services, damages to agriculture and livestock due to Hurricane Karl -category 3. |
| Coscomatepec | 09/Aug/2012 | Heavy rains        | Damage to highways and roads due to tropical storm Ernesto                                                       |
| Coscomatepec | 23/Sep/2013 | Heavy rains        | Hundreds of homes affected. Roads and bridges damaged by a cold front                                            |

Fuente: LaRed, 2019

Supplementary Material 3. Climate change scenarios of precipitation, maximum and minimum temperature with RCP 8.5 for Chocamán, Veracruz.

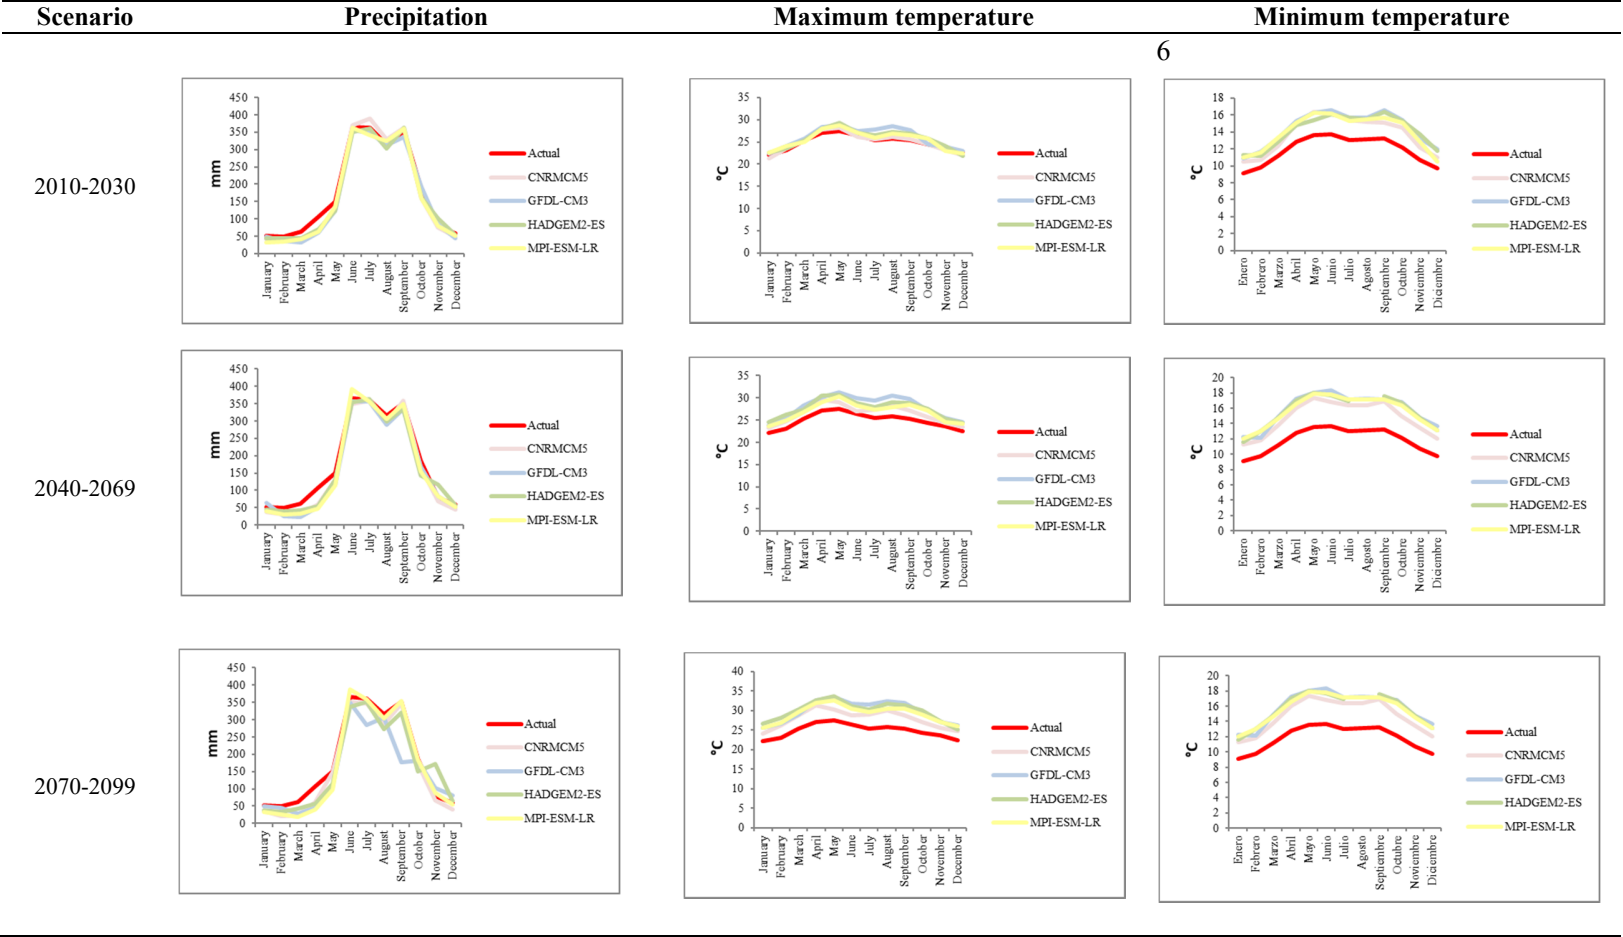

#### Supplementary Material 4. Cohorts species by agroforestry design in coffee plots.

| Agroforestry design     | Cohort          | Species with highest importance value            | Tree / Plant Density (ha <sup>1</sup> )    |
|-------------------------|-----------------|--------------------------------------------------|--------------------------------------------|
| Af1                     | Shade trees     | <i>Lippia myriocephala</i> Schltdl. & Cham       | 88                                         |
|                         |                 | <i>Inga vera</i> Willd                           | 96                                         |
|                         |                 | <i>Juglans olanchana</i> Standl & L. O. Williams | 96                                         |
|                         | Coffee          | <i>Coffea arabica</i> L                          | 2600                                       |
|                         | Living barriers | <i>Bursera</i> sp.                               | 1500                                       |
| Af2                     | Shade trees     | <i>Acrocarpus fraxinifolius</i> Wight            | 32                                         |
|                         |                 | <i>Inga vera</i> Willd                           | 72                                         |
|                         |                 | <i>Juglans olanchana</i> Standl & L. O. Williams | 80                                         |
|                         | Coffee          | <i>Coffea arabica</i> L                          | 2800                                       |
|                         | Banana tree     | <i>Musa acuminata</i> Colla                      | 1250                                       |
|                         | Living barriers | <i>Bursera</i> sp.                               | 1600                                       |
|                         | Af3             | Shade trees                                      | <i>Lippia myriocephala</i> Schltdl. & Cham |
| <i>Inga vera</i> Willd  |                 |                                                  | 38                                         |
| <i>Coffea arabica</i> L |                 |                                                  | 3100                                       |
| Banana tree             |                 | <i>Musa acuminata</i> Colla                      | 1650                                       |
| Living fences           |                 | <i>Inga</i> sp.                                  | 80                                         |

Agroforestry design 1 (Af1): Coffee with shade trees and living barriers; Agroforestry design 2 (Af2): Coffee with shade trees, banana and living barriers; and Agroforestry design 3 (Af3): Coffee with shade trees, banana and living fences.

**Supplementary Material 5. Water balance variables: current and future monthly humidity index and soil moisture storage, RCP 8.5 by 2099.**

| Month     | Monthly humidity index |              |              |              |              |
|-----------|------------------------|--------------|--------------|--------------|--------------|
|           | Current                | CNRM         | GFDL         | HADGEM       | MPI          |
| January   | Humid                  | Intermediate | Intermediate | Intermediate | Dry          |
| February  | Intermediate           | Intermediate | Intermediate | Intermediate | Dry          |
| March     | Dry                    | Intermediate | Dry          | Intermediate | Dry          |
| April     | Dry                    | Intermediate | Dry          | Intermediate | Dry          |
| May       | Intermediate           | Humid        | Intermediate | Humid        | Dry          |
| June      | Humid                  | Humid        | Humid        | Humid        | Humid        |
| July      | Humid                  | Humid        | Humid        | Humid        | Intermediate |
| August    | Humid                  | Humid        | Humid        | Humid        | Intermediate |
| September | Humid                  | Humid        | Humid        | Humid        | Humid        |
| October   | Humid                  | Humid        | Humid        | Humid        | Intermediate |
| November  | Humid                  | Intermediate | Humid        | Humid        | Dry          |
| December  | Humid                  | Intermediate | Intermediate | Intermediate | Dry          |
| Year      | Humid                  | Humid        | Humid        | Humid        | Intermediate |

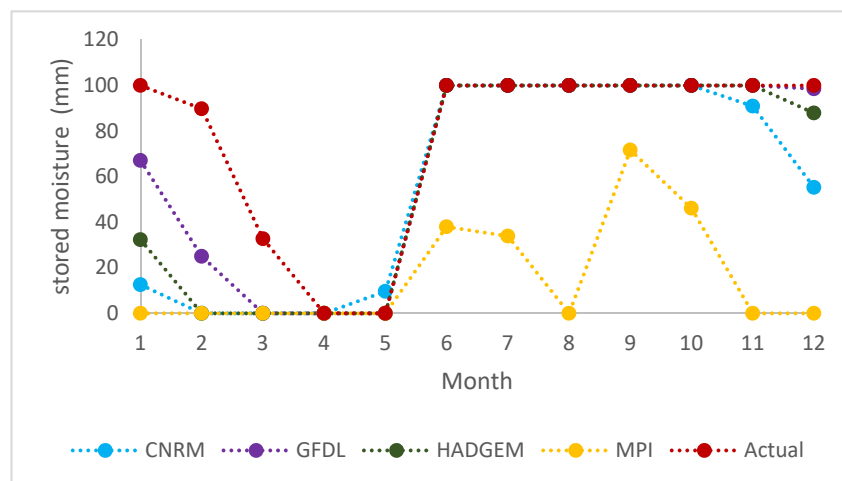

**Figure 1. Soil moisture storage (mm) by month, current and climate change scenarios, RCP 8.5 by 2099.**

## **Supplementary Material 6. Main questions guide for interviews**

### **A. Weather and climate threat**

Have changes in temperature been detected in recent years?  
Have the rains been erratic in recent years?  
Have there been torrential rains with floods and landslides?  
Have there been droughts () or heat waves () in recent years?  
Have there been any changes in dog days or *canícula* season?  
Has the force and frequency of strong winds increased?  
Has snowfall (), frost () or hail () occurred out of season and at a higher () or lower intensity ()?  
Have cold fronts increased in recent years?

### **B. Impact on the agricultural development of coffee**

Is there irregular flowering on coffee plants?  
Is there an increase in the fall of flowers and coffee fruits?  
Has there been any damage to the coffee bean? Which?  
Have impacts been observed on coffee leaves? Which?  
At what time of year was the main damage to the coffee plantation observed?  
What diseases and pests have occurred in recent years?  
In recent years, has the damage of pests and diseases in coffee plantations increased? Which?  
At what time of year have pests and diseases increased? Which?  
Do the soils show signs of erosion?

### **C. Adaptation actions that are being implemented individually or collectively**

Is your coffee plantation in full sun (), with little shade (<20%) () or with excess shade (> 70%)?  
Do you use diversified trees and shrubs within your plot?  
What management practices do you give to the trees and shrubs used for shade in the coffee plantation?  
Is there a preferred tree or shrub species for shade in the coffee plantation? Why?  
What tree or shrub species do you avoid using? Why?  
What strategies at the individual level have you implemented to reduce the impact of the change in climate variables in your coffee plantations? Mention what weather threat you are implementing it for.  
What strategies have you implemented at the collective level to reduce the impact of the change in climate variables in your coffee plantations? Mention what weather threat you are implementing it for.  
What strategies do you use to reduce soil erosion if it exists on your plots?  
What practices do you carry out at the organization level to reduce water use?  
What practices do you carry out at the individual level to reduce water use?  
What other aspects do you think should be strengthened to continue producing coffee?



## References

- Díaz, J. A. B. O., A. G. Naranjo, N. J. V. Mancera, T. H. Tejeda, M. de Jesús Ordóñez Díaz, and R. Dávalos-Sotelo. 2015. Density of Mexican Woods by Vegetation Type Based on J. Rzedowski's Classification: Compilation. *Madera Bosques* 21:77–126.
- Kuyah, Shem, Johannes Dietz, Catherine Muthuri, Ramni Jamnadass, Peter Mwangi, Richard Coe, and Henry Neufeldt. 2012. Allometric Equations for Estimating Biomass in Agricultural Landscapes: I. Aboveground Biomass. *Agriculture, Ecosystems and Environment* 158: 216–24.
- LaRed, 2019. Inventario histórico de desastres en México. Desinventar, LaRed. Corporación OSSO – Colombia. <https://www.desinventar.org/es/database>
- Negash, Mesele and Markku Kanninen. 2015. Modeling Biomass and Soil Carbon Sequestration of Indigenous Agroforestry Systems Using CO2FIX Approach. *Agriculture, Ecosystems and Environment* 203:147–55.
- Negash, Mesele, Mike Starr, and Markku Kanninen. 2013. Allometric Equations for Biomass Estimation of Enset (*Ensete Ventricosum*) Grown in Indigenous Agroforestry Systems in the Rift Valley Escarpment of Southern-Eastern Ethiopia. *Agroforestry Systems* 87(3):571–81.
- Negash, Mesele, Mike Starr, Markku Kanninen, and Leakemariam Berhe. 2013. Allometric Equations for Estimating Aboveground Biomass of *Coffea Arabica* L. Grown in the Rift Valley Escarpment of Ethiopia. *Agroforestry Systems* 87(4):953–66.
- Nyombi, K., P. J. A. Van Asten, P. A. Leffelaar, M. Corbeels, C. K. Kaizzi, and K. E. Giller. 2009. Allometric Growth Relationships of East Africa Highland Bananas (*Musa AAA-EAHB*) Cv. Kisansa and Mbwarzirume. *Annals of Applied Biology* 155(3):403–18.
- Segura, Milena, Markku Kanninen, and Damaris Suárez. 2006. Allometric Models for Estimating Aboveground Biomass of Shade Trees and Coffee Bushes Grown Together. *Agroforestry Systems* 68(2):143–50.
